# Supplementary material
Source: publisher figshare collection journal article supplement (https://aacr.figshare.com/articles/dataset/_/23814309)
Supplement: Supplementary file 1 [file 41783166]

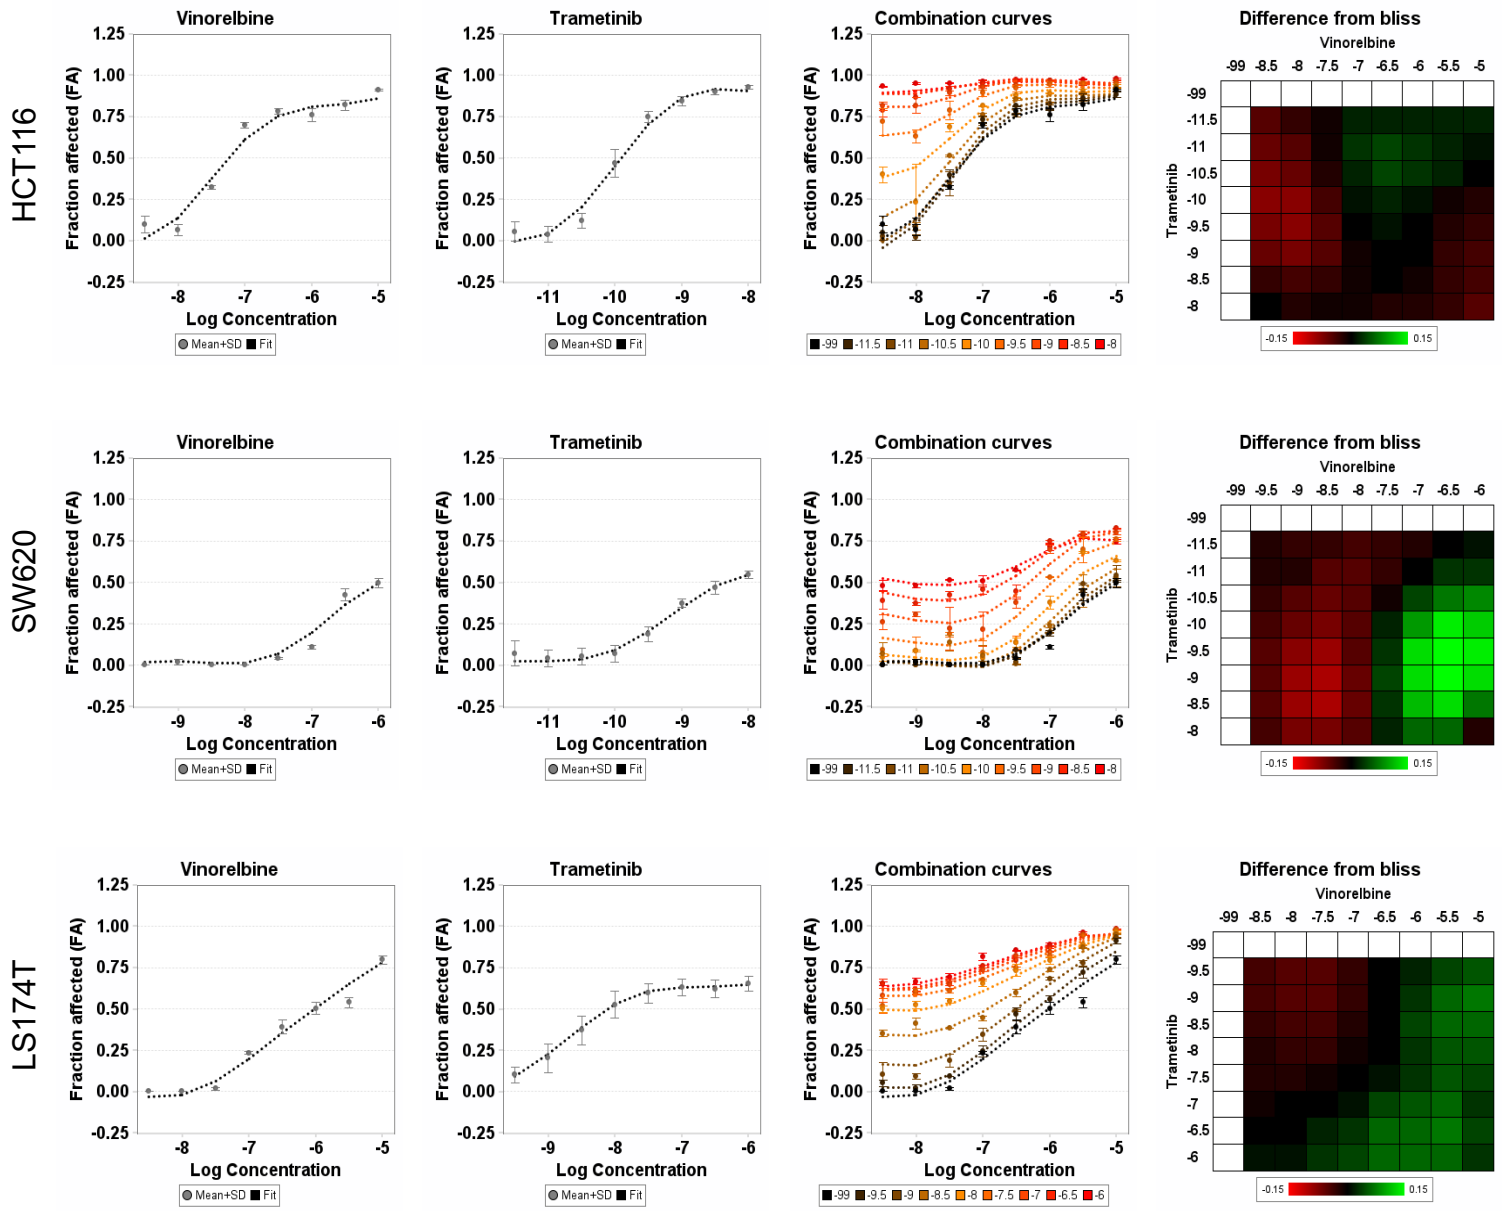

**Supplementary Figure 6: HTS identified vinorelbine as synergistic with the MEK inhibitor trametinib in KRAS-mutant CRC 3D spheroids.**

HTS using HCT116, SW620 and LS174T 3D spheroids. Left three panels: 3D spheroid growth curves for the probe drug vinorelbine and anchor drug trametinib as single agents and in combinations at the indicated concentrations based on CellTiter Glo assays. Right panel: heat maps showing drug synergy as measured by difference from Bliss. Green areas represent difference from Bliss  $>0$ , indicating synergy.
